# Supplementary material for: The Gap Procedure: for the identification of phylogenetic clusters in HIV-1 sequence data
Source: PubMed Central journal article supplement (PMC4634160; doi:10.1186/s12859-015-0791-x), 2015-11-04
Supplement: 12859_2015_791_MOESM1_ESM.pdf [file 12859_2015_791_MOESM1_ESM.pdf]

## Constructing the distance matrix

Let  $\mathbf{X} = (X_1, \dots, X_N)$  be our data consisting of  $N$  aligned sequences of length  $L$ . Let  $x_{ij}$  be the  $j$ th site ( $j = 1, \dots, L$ ) of the  $i$ th sequence ( $i = 1, \dots, N$ ) such that  $x_{ij} \in \mathcal{S} = \{A, C, G, T, R, Y, M, K, S, W, H, B, V, D, N, -\}$  (cf. IUPAC codes [3]). Many functions for computing pairwise distances between sequences ignore sites with ambiguous nucleotides, i.e., the symbols  $\{R, Y, M, K, S, W, H, B, V, D, N\}$ . Rather than deleting the incomplete information provided from these sites, we use the adjusted distance formulae described below. We first describe this adjustment under the JC69 model, followed by the more relaxed K80 model. For a nice overview of these (and other) distance formulae, see [4].

### Adjusted JC69 (aJC69) distances

The rate matrix for the Jukes and Cantor 1969 (JC69) model [5] is given by:

$$\mathbb{Q}_{\text{JC69}} = \{q_{ij}\} = \begin{matrix} & T & C & A & G \\ \begin{matrix} T \\ C \\ A \\ G \end{matrix} & \begin{pmatrix} \cdot & \lambda & \lambda & \lambda \\ \lambda & \cdot & \lambda & \lambda \\ \lambda & \lambda & \cdot & \lambda \\ \lambda & \lambda & \lambda & \cdot \end{pmatrix} \end{matrix}$$

The unadjusted distance formula is calculated using:

$$\hat{d}(X_i, X_j) = -\frac{3}{4} \log \left( 1 - \frac{4 p_{ij}}{3 L} \right) \quad (1)$$

where  $p_{ij}$  is the number of sites that are different between two sequences  $X_i = (x_{i1}, x_{i2}, \dots, x_{iN})$  and  $X_j = (x_{j1}, x_{j2}, \dots, x_{jN})$ . The *adjusted* distance formula is given by:

$$\hat{\hat{d}}(X_i, X_j) = -\frac{3}{4} \log \left( 1 - \frac{4 \mathbb{E}[P_{ij} | X_i, X_j]}{3 L} \right) \quad (2)$$

where  $\mathbb{E}[P_{ij} | X_i, X_j]$  is the expected number of sites that are different between the two sequences under the assumption that all nucleotides represented by the ambiguity codes are equally likely. We refer to the distances calculated using (2) as “adjusted JC69”, or aJC69, distances. Let  $Y_s$  be a random variable equal to 0 if the two nucleotides are surely identical at site  $s$ , and 1, otherwise. As a simple example, suppose we have  $x_{is} = R$  (base A or G) and  $x_{js} = D$  (base A, G or T). The sample space and the corresponding value of  $Y_s$  are given in the table below.

| Outcomes<br>$P(\text{Outcome})$ | AA<br>$\frac{1}{6}$ | AG<br>$\frac{1}{6}$ | AT<br>$\frac{1}{6}$ | GA<br>$\frac{1}{6}$ | GG<br>$\frac{1}{6}$ | GT<br>$\frac{1}{6}$ |
|---------------------------------|---------------------|---------------------|---------------------|---------------------|---------------------|---------------------|
| $Y_s$                           | 0                   | 1                   | 1                   | 1                   | 0                   | 1                   |

Then

$$\begin{aligned} E[Y_s | x_{is} = R, x_{js} = D] &= 0 \cdot P(Y_s = 0 | x_{is} = R, x_{js} = D) + 1 \cdot P(Y_s = 1 | x_{is} = R, x_{js} = D) \\ &= 0 \cdot \left(\frac{2}{6}\right) + 1 \cdot \left(\frac{4}{6}\right) = \frac{2}{3} \end{aligned}$$

$\mathbb{E}[P_{ij} | X_i, X_j]$  is therefore given by

$$\begin{aligned} &= \mathbb{E}[Y_1 | x_{11} = a_1, x_{21} = b_1] + \mathbb{E}[Y_2 | x_{12} = a_2, x_{22} = b_1] + \dots + \mathbb{E}[Y_N | x_{1N} = a_N, x_{2N} = b_N] \\ &= \mathbb{E}[Y_1 | a_1 b_1] + \mathbb{E}[Y_2 | a_2 b_1] + \dots + \mathbb{E}[Y_N | a_N b_N] \quad (\text{for shorthand}) \end{aligned}$$

The conditional expected value of  $Y_s$  is given for the entire sample space in Table S1. Notice how this value is not 0 for matching ambiguous nucleotides. For instance,  $\mathbb{E}[Y_s | DD] = 2/3$  despite the fact that the IUPAC codes are identical.

**Table S1: IUPAC Nomenclature and conditional expectations of  $Y_s$ .** The  $\mathbb{E}[Y_s | a_s b_s]$  where  $a_s$  and  $b_s$  are indicated on the left and top margin, respectively. The corresponding bases for the IUPAC codes are also provided.

|       | Bases | $b_s$         |               |               |               |               |               |               |               |               |               |               |               |               |               |               |   |
|-------|-------|---------------|---------------|---------------|---------------|---------------|---------------|---------------|---------------|---------------|---------------|---------------|---------------|---------------|---------------|---------------|---|
|       |       | A             | C             | G             | T             | R             | M             | W             | S             | K             | Y             | V             | H             | D             | B             | N             | - |
|       | A     | 0             | 1             | 1             | 1             | $\frac{1}{2}$ | $\frac{1}{2}$ | $\frac{1}{2}$ | 1             | 1             | 1             | $\frac{1}{3}$ | $\frac{1}{3}$ | $\frac{1}{3}$ | 1             | $\frac{3}{4}$ | 1 |
|       | C     | 1             | 0             | 1             | 1             | $\frac{1}{2}$ | $\frac{1}{2}$ | 1             | $\frac{1}{2}$ | 1             | $\frac{1}{2}$ | $\frac{1}{3}$ | $\frac{1}{3}$ | 1             | $\frac{1}{3}$ | $\frac{3}{4}$ | 1 |
|       | G     | 1             | 1             | 0             | 1             | $\frac{1}{2}$ | $\frac{1}{2}$ | 1             | 1             | 1             | 1             | $\frac{1}{3}$ | 1             | $\frac{1}{3}$ | $\frac{1}{3}$ | $\frac{3}{4}$ | 1 |
|       | T     | 1             | 1             | 1             | 0             | $\frac{1}{2}$ | $\frac{1}{2}$ | $\frac{1}{2}$ | 1             | 1             | 1             | 1             | $\frac{1}{3}$ | $\frac{1}{3}$ | $\frac{1}{3}$ | $\frac{3}{4}$ | 1 |
| $a_s$ | R     | $\frac{1}{2}$ | 1             | $\frac{1}{2}$ | 1             | $\frac{1}{2}$ | $\frac{3}{4}$ | $\frac{3}{4}$ | $\frac{3}{4}$ | $\frac{3}{4}$ | 1             | $\frac{2}{6}$ | $\frac{2}{6}$ | $\frac{2}{6}$ | $\frac{2}{6}$ | $\frac{6}{8}$ | 1 |
|       | M     | $\frac{1}{2}$ | $\frac{1}{2}$ | 1             | 1             | $\frac{1}{2}$ | $\frac{3}{4}$ | $\frac{3}{4}$ | $\frac{3}{4}$ | 1             | $\frac{3}{4}$ | $\frac{2}{6}$ | $\frac{2}{6}$ | $\frac{2}{6}$ | $\frac{2}{6}$ | $\frac{6}{8}$ | 1 |
|       | W     | $\frac{1}{2}$ | 1             | 1             | $\frac{1}{2}$ | $\frac{1}{2}$ | $\frac{3}{4}$ | $\frac{3}{4}$ | 1             | $\frac{3}{4}$ | $\frac{3}{4}$ | $\frac{2}{6}$ | $\frac{2}{6}$ | $\frac{2}{6}$ | $\frac{2}{6}$ | $\frac{6}{8}$ | 1 |
|       | S     | 1             | $\frac{1}{2}$ | 1             | 1             | $\frac{1}{2}$ | $\frac{3}{4}$ | 1             | 1             | $\frac{3}{4}$ | $\frac{3}{4}$ | $\frac{2}{6}$ | $\frac{2}{6}$ | $\frac{2}{6}$ | $\frac{2}{6}$ | $\frac{6}{8}$ | 1 |
|       | K     | 1             | 1             | $\frac{1}{2}$ | $\frac{1}{2}$ | $\frac{1}{2}$ | $\frac{3}{4}$ | $\frac{3}{4}$ | $\frac{3}{4}$ | 1             | $\frac{3}{4}$ | $\frac{2}{6}$ | $\frac{2}{6}$ | $\frac{2}{6}$ | $\frac{2}{6}$ | $\frac{6}{8}$ | 1 |
| Y     | 1     | $\frac{1}{2}$ | 1             | $\frac{1}{2}$ | 1             | $\frac{3}{4}$ | $\frac{3}{4}$ | $\frac{3}{4}$ | $\frac{3}{4}$ | $\frac{3}{4}$ | $\frac{2}{6}$ | $\frac{2}{6}$ | $\frac{2}{6}$ | $\frac{2}{6}$ | $\frac{6}{8}$ | 1             |   |
|       | V     | $\frac{2}{3}$ | $\frac{2}{3}$ | $\frac{2}{3}$ | 1             | $\frac{2}{6}$ | $\frac{2}{6}$ | $\frac{2}{6}$ | $\frac{2}{6}$ | $\frac{2}{6}$ | $\frac{2}{6}$ | $\frac{2}{6}$ | $\frac{2}{6}$ | $\frac{2}{6}$ | $\frac{2}{6}$ | $\frac{3}{4}$ | 1 |
|       | H     | $\frac{2}{3}$ | $\frac{2}{3}$ | 1             | $\frac{2}{3}$ | $\frac{2}{6}$ | $\frac{2}{6}$ | $\frac{2}{6}$ | $\frac{2}{6}$ | $\frac{2}{6}$ | $\frac{2}{6}$ | $\frac{2}{6}$ | $\frac{2}{6}$ | $\frac{2}{6}$ | $\frac{2}{6}$ | $\frac{3}{4}$ | 1 |
|       | D     | 1             | 1             | $\frac{2}{3}$ | $\frac{2}{3}$ | $\frac{2}{6}$ | $\frac{2}{6}$ | $\frac{2}{6}$ | $\frac{2}{6}$ | $\frac{2}{6}$ | $\frac{2}{6}$ | $\frac{2}{6}$ | $\frac{2}{6}$ | $\frac{2}{6}$ | $\frac{2}{6}$ | $\frac{3}{4}$ | 1 |
|       | B     | 1             | $\frac{2}{3}$ | $\frac{2}{3}$ | $\frac{2}{3}$ | $\frac{2}{6}$ | $\frac{2}{6}$ | $\frac{2}{6}$ | $\frac{2}{6}$ | $\frac{2}{6}$ | $\frac{2}{6}$ | $\frac{2}{6}$ | $\frac{2}{6}$ | $\frac{2}{6}$ | $\frac{2}{6}$ | $\frac{3}{4}$ | 1 |
|       | N     | $\frac{3}{4}$ | $\frac{3}{4}$ | $\frac{3}{4}$ | $\frac{3}{4}$ | $\frac{3}{4}$ | $\frac{3}{4}$ | $\frac{3}{4}$ | $\frac{3}{4}$ | $\frac{3}{4}$ | $\frac{3}{4}$ | $\frac{3}{4}$ | $\frac{3}{4}$ | $\frac{3}{4}$ | $\frac{3}{4}$ | $\frac{3}{4}$ | 1 |
|       | -     | 1             | 1             | 1             | 1             | 1             | 1             | 1             | 1             | 1             | 1             | 1             | 1             | 1             | 1             | 1             | 0 |

## Adjusted K80 (aK80) distances

The rate matrix for the Kimura 1980 (K80) model [6] is given by:

$$Q_{\text{K80}} = \{q_{ij}\} = \begin{matrix} & \begin{matrix} T & C & A & G \end{matrix} \\ \begin{matrix} T \\ C \\ A \\ G \end{matrix} & \begin{pmatrix} \cdot & \alpha & \beta & \beta \\ \alpha & \cdot & \beta & \beta \\ \beta & \beta & \cdot & \alpha \\ \beta & \beta & \alpha & \cdot \end{pmatrix} \end{matrix}$$

The adjusted K80, or aK80, distances are calculated by:

$$\hat{d}(X_i, X_j) = -\frac{1}{2} \log \left( 1 - 2 \frac{\mathbb{E}[S]}{L} - \frac{\mathbb{E}[V]}{L} \right) - \frac{1}{4} \log \left( 1 - 2 \frac{\mathbb{E}[V]}{L} \right)$$

where

$\mathbb{E}[S]$  =the expected number of sites with transitional differences

$\mathbb{E}[V]$  =the expected number of sites with two transversional differences

Let  $W_s$  be a random variable equal to 1 if the two nucleotides at site  $s$  are surely a transition (i.e.  $A \leftrightarrow G, C \leftrightarrow T$ ) and 0 otherwise. Similarly, we define  $Z_s$  to be a random variable equal to 1 if the two nucleotides at site  $s$  are surely a transversion (i.e.  $A \leftrightarrow T/C, G \leftrightarrow T/C, C \leftrightarrow A/G, T \leftrightarrow A/G$ ) and 0 otherwise. Again, suppose  $x_{is} = R$  and  $x_{js} = D$ . The sample space and the corresponding values of  $W_s$  and  $Z_s$  are given in the table below.

| Outcomes<br>$P(\text{Outcome})$ | AA | AG | AT | GA | GG | GT |
|---------------------------------|----|----|----|----|----|----|
| $W_s$                           | 0  | 1  | 0  | 1  | 0  | 0  |
| $Z_s$                           | 0  | 0  | 1  | 0  | 0  | 1  |

For example,  $E[W_s | x_{is} = R, x_{js} = D]$  is given by

$$\begin{aligned} &= 0 \cdot P(W_s = 0 | x_{is} = R, x_{js} = D) + 1 \cdot P(W_s = 1 | x_{is} = R, x_{js} = D) \\ &= 0 \cdot \left(\frac{4}{6}\right) + 1 \cdot \left(\frac{2}{6}\right) = \frac{1}{3} \end{aligned}$$

and  $E[Z_s | x_{is} = R, x_{js} = D]$  is given by

$$\begin{aligned} &= 0 \cdot P(Z_s = 0 | x_{is} = R, x_{js} = D) + 1 \cdot P(Z_s = 1 | x_{is} = R, x_{js} = D) \\ &= 0 \cdot \left(\frac{4}{6}\right) + 1 \cdot \left(\frac{2}{6}\right) = \frac{1}{3} \end{aligned}$$

The following expectations are therefore given by

$$\begin{aligned} \mathbb{E}[S | X_i X_j] &= \mathbb{E}[W_1 | a_1 b_1] + \mathbb{E}[W_2 | a_2 b_1] + \dots + \mathbb{E}[W_N | a_N b_N] \\ \mathbb{E}[V | X_i X_j] &= \mathbb{E}[Z_1 | a_1 b_1] + \mathbb{E}[Z_2 | a_2 b_1] + \dots + \mathbb{E}[Z_N | a_N b_N] \end{aligned}$$

Figure S1 plots the aK80 and K80 pairwise distances between sequences from the mbc data set. As evident from these plots, a larger genetic diversity can be discovered when ambiguous sites are taken into account.

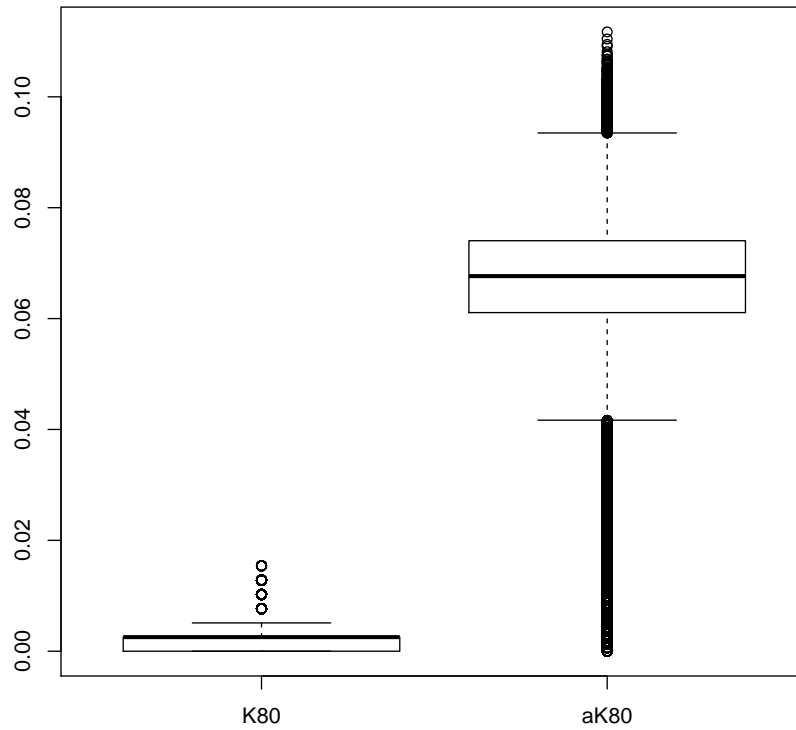

**Figure S1: Boxplots of pairwise distances.** Boxplots of the pairwise distances between sequences from the mibc data set (containing 627 sequences of length 810). The boxplot on the left uses the K80 pairwise distances computed using the `dist.dna()` function from the `ape` package. The boxplot on the right uses the aK80 distances described herein.

## References

- [1] Dondoshansky, I., Wolf, Y.: BLASTclust. Bioinformatics Toolkit, Max-Planck Institute for Developmental Biology: <http://toolkit.tuebingen.mpg.de/blastclust> (2008–2015)
- [2] Swofford, D.L.: PAUP\*. Phylogenetic Analysis Using Parsimony (and other methods). version 4. (2003)
- [3] Cornish-Bowden, A.: IUPAC-IUB symbols for nucleotide nomenclature. *Nucleic Acids Res* **13**, 3021–3030 (1985)

- [4] Yang, Z.: Computational Molecular Evolution. Oxford University Press Oxford, Oxford (2006)
- [5] Jukes, T.H., Cantor, C.R.: Evolution of protein molecules. Mammalian Protein Metabolism, 21–132 (1969)
- [6] Kimura, M.: A simple method for estimating evolutionary rates of base substitutions through comparative studies of nucleotide sequences. Journal of molecular evolution **16**(2), 111–120 (1980)
