# Supplementary material for: The Gap Procedure: for the identification of phylogenetic clusters in HIV-1 sequence data
Source: PubMed Central journal article supplement (PMC4634160; doi:10.1186/s12859-015-0791-x), 2015-11-04
Supplement: 12859_2015_791_MOESM6_ESM.pdf [file 12859_2015_791_MOESM6_ESM.pdf]

## Cluster results for the RAxML and MrBayes clusters on simulated data with $T_d = 0.4, 0.5$

**Table S1: Clustering Results for RAxML on simulated data with  $T_d = 0.4, 0.5$ .** The clustering results (for a single run) obtained by the RAxML when applied to the simulated data. The quoted run times represent the time it takes RAxML to produce a phylogenetic tree. Clade support values are subsequently conducted using 100 bootstrap replicates. RAxML clusters are obtained using a clade support threshold equal to  $T_c$  and distance threshold of  $T_d$ . The ARI scores in bold indicate which runs performed better than the average score obtained using the Gap Procedure.

| Sim | $T_c$ | $T_d$ | Time (in sec) | # clusters | # singletons | ARI           |
|-----|-------|-------|---------------|------------|--------------|---------------|
| 1   | 90    | 0.4   | 2478.966      | 7          | 5            | 0.8606        |
| 2   | 90    | 0.4   | 4653.993      | 9          | 5            | 0.8945        |
| 3   | 90    | 0.4   | 41584.55      | 24         | 6            | <b>0.9764</b> |
| 4   | 90    | 0.4   | 271593.7      | 105        | 33           | 0.8044        |
| 1   | 90    | 0.5   | 2478.966      | 7          | 4            | 0.8757        |
| 2   | 90    | 0.5   | 4653.993      | 9          | 5            | 0.8945        |
| 3   | 90    | 0.5   | 41584.55      | 24         | 6            | <b>0.9764</b> |
| 4   | 90    | 0.5   | 271593.7      | 54         | 2            | <b>0.9922</b> |

**Table S2: Clustering Results for MrBayes on simulated data with  $T_d = 0.4, 0.5$ .** The clustering results (for a single run) obtained by MrBayes when applied to the simulated data. The quoted run times represent the time it takes MrBayes to estimate a phylogenetic tree with clade support (i.e., posterior probability) values. MrBayes clusters are obtained using a clade support threshold equal to  $T_c$  and a distance threshold of  $T_d$ . The ARI scores in bold indicate which runs performed better than the average score obtained using the Gap Procedure.

| Sim | $T_c$ | $T_d$ | Time (in sec) | # clusters | # singletons | ARI           |
|-----|-------|-------|---------------|------------|--------------|---------------|
| 1   | 90    | 0.4   | 3324.68       | 9          | 2            | 0.7125        |
| 2   | 90    | 0.4   | 4243.64       | 11         | 3            | 0.8529        |
| 3   | 90    | 0.4   | 144284.8      | 38         | 8            | 0.8344        |
| 4   | 90    | 0.4   | 1328254       | 122        | 24           | 0.6745        |
| 1   | 90    | 0.5   | 3324.68       | 8          | 2            | 0.8419        |
| 2   | 90    | 0.5   | 4243.64       | 10         | 3            | 0.9011        |
| 3   | 90    | 0.5   | 144284.8      | 24         | 6            | <b>0.9768</b> |
| 4   | 90    | 0.5   | 1328254       | 67         | 4            | 0.9448        |
