# Supplementary material for: The Gap Procedure: for the identification of phylogenetic clusters in HIV-1 sequence data
Source: PubMed Central journal article supplement (PMC4634160; doi:10.1186/s12859-015-0791-x), 2015-11-04
Supplement: 12859_2015_791_MOESM7_ESM.pdf [file 12859_2015_791_MOESM7_ESM.pdf]

## Cluster results for the RAxML and MrBayes clusters on the mibc data

**Table S1: The threshold values and corresponding clustering results for RAxML on the mibc data.** The clustering results obtained by RAxML when applied to the mibc data. The quoted run times represent the time it takes RAxML to estimate a phylogenetic tree. Clusters are obtained using a clade support threshold equal to  $T_c$  and a distance threshold of  $T_d$ .

| $T_c$ | $T_d$ | Time (in sec) | 1 ✓ | 1 ✗ | 2-4      | ≥ 5      | ARI    |
|-------|-------|---------------|-----|-----|----------|----------|--------|
| 90    | 0.01  | 56290.46      | -   | 0   | 75 (175) | 6 (409)  | 0.0176 |
| 90    | 0.02  | 56290.46      | -   | 0   | 64 (157) | 20 (427) | 0.0545 |
| 90    | 0.03  | 56290.46      | -   | 0   | 43 (104) | 34 (480) | 0.1748 |
| 90    | 0.04  | 56290.46      | -   | 0   | 28 (69)  | 44 (515) | 0.5421 |
| 90    | 0.05  | 56290.46      | -   | 0   | 17 (42)  | 50 (542) | 0.7632 |
| 90    | 0.06  | 56290.46      | -   | 0   | 17 (42)  | 50 (542) | 0.7632 |
| 90    | 0.07  | 56290.46      | -   | 0   | 12 (30)  | 51 (554) | 0.8977 |
| 90    | 0.08  | 56290.46      | -   | 0   | 12 (30)  | 51 (554) | 0.8977 |
| 90    | 0.09  | 56290.46      | -   | 0   | 12 (30)  | 51 (554) | 0.8977 |
| 90    | 0.1   | 56290.46      | -   | 0   | 12 (30)  | 51 (554) | 0.8977 |
| 95    | 0.01  | 56290.46      | -   | 0   | 61 (139) | 5 (445)  | 0.0127 |
| 95    | 0.02  | 56290.46      | -   | 0   | 53 (129) | 18 (455) | 0.0444 |
| 95    | 0.03  | 56290.46      | -   | 0   | 37 (89)  | 31 (495) | 0.1230 |
| 95    | 0.04  | 56290.46      | -   | 0   | 23 (58)  | 43 (526) | 0.4878 |
| 95    | 0.05  | 56290.46      | -   | 0   | 17 (42)  | 47 (542) | 0.6030 |
| 95    | 0.06  | 56290.46      | -   | 0   | 17 (42)  | 47 (542) | 0.6030 |
| 95    | 0.07  | 56290.46      | -   | 0   | 17 (42)  | 47 (542) | 0.6030 |
| 95    | 0.08  | 56290.46      | -   | 0   | 17 (42)  | 47 (542) | 0.6030 |
| 95    | 0.09  | 56290.46      | -   | 0   | 17 (42)  | 47 (542) | 0.6030 |
| 95    | 0.1   | 56290.46      | -   | 0   | 17 (42)  | 47 (542) | 0.6030 |
| 98    | 0.01  | 56290.46      | -   | 0   | 50 (114) | 5 (470)  | 0.0098 |
| 98    | 0.02  | 56290.46      | -   | 0   | 49 (117) | 13 (467) | 0.0271 |
| 98    | 0.03  | 56290.46      | -   | 0   | 38 (90)  | 26 (494) | 0.0885 |
| 98    | 0.04  | 56290.46      | -   | 0   | 26 (63)  | 36 (521) | 0.2955 |
| 98    | 0.05  | 56290.46      | -   | 0   | 20 (49)  | 40 (535) | 0.3720 |
| 98    | 0.06  | 56290.46      | -   | 0   | 20 (49)  | 40 (535) | 0.3720 |
| 98    | 0.07  | 56290.46      | -   | 0   | 20 (49)  | 40 (535) | 0.3720 |
| 98    | 0.08  | 56290.46      | -   | 0   | 20 (49)  | 40 (535) | 0.3720 |
| 98    | 0.09  | 56290.46      | -   | 0   | 20 (49)  | 40 (535) | 0.3720 |
| 98    | 0.1   | 56290.46      | -   | 0   | 20 (49)  | 40 (535) | 0.3720 |
| 99    | 0.01  | 56290.46      | -   | 0   | 43 (100) | 5 (484)  | 0.0081 |
| 99    | 0.02  | 56290.46      | -   | 0   | 42 (102) | 11 (482) | 0.0182 |
| 99    | 0.03  | 56290.46      | -   | 0   | 33 (79)  | 23 (505) | 0.0670 |
| 99    | 0.04  | 56290.46      | -   | 0   | 24 (61)  | 31 (523) | 0.2014 |
| 99    | 0.05  | 56290.46      | -   | 0   | 22 (55)  | 33 (529) | 0.2379 |
| 99    | 0.06  | 56290.46      | -   | 0   | 22 (55)  | 33 (529) | 0.2379 |
| 99    | 0.07  | 56290.46      | -   | 0   | 22 (55)  | 33 (529) | 0.2379 |
| 99    | 0.08  | 56290.46      | -   | 0   | 22 (55)  | 33 (529) | 0.2379 |
| 99    | 0.09  | 56290.46      | -   | 0   | 22 (55)  | 33 (529) | 0.2379 |
| 99    | 0.1   | 56290.46      | -   | 0   | 22 (55)  | 33 (529) | 0.2379 |

**Table S2: The threshold values and corresponding clustering results for MrBayes on mibc data.** The clustering results obtained by MrBayes when applied to the mibc data. The quoted run times represent the time it takes for MrBayes to estimate a phylogenetic tree with posterior probability branch values. Clusters are obtained using a clade support threshold equal to  $T_c$  and distance threshold of  $T_d$ .

| $T_c$ | $T_d$ | Time (in sec) | 1 ✓ | 1 ✗ | 2-4       | $\geq 5$ | ARI    |
|-------|-------|---------------|-----|-----|-----------|----------|--------|
| 90    | 0.01  | 452802.6      | -   | 0   | 103 (250) | 11 (377) | 0.0151 |
| 90    | 0.02  | 452802.6      | -   | 0   | 86 (217)  | 33 (410) | 0.0698 |
| 90    | 0.03  | 452802.6      | -   | 0   | 66 (170)  | 40 (457) | 0.2175 |
| 90    | 0.04  | 452802.6      | -   | 0   | 40 (107)  | 52 (520) | 0.4720 |
| 90    | 0.05  | 452802.6      | -   | 0   | 8 (22)    | 59 (605) | 0.9011 |
| 90    | 0.06  | 452802.6      | -   | 0   | 3 (8)     | 58 (619) | 0.9472 |
| 90    | 0.07  | 452802.6      | -   | 0   | 3 (8)     | 58 (619) | 0.9472 |
| 90    | 0.08  | 452802.6      | -   | 0   | 3 (8)     | 58 (619) | 0.9472 |
| 90    | 0.09  | 452802.6      | -   | 0   | 3 (10)    | 55 (617) | 0.9968 |
| 90    | 0.1   | 452802.6      | -   | 0   | 3 (10)    | 52 (617) | 0.9761 |
| 95    | 0.01  | 452802.6      | -   | 0   | 94 (225)  | 11 (402) | 0.0130 |
| 95    | 0.02  | 452802.6      | -   | 0   | 81 (203)  | 31 (424) | 0.0588 |
| 95    | 0.03  | 452802.6      | -   | 0   | 64 (163)  | 38 (464) | 0.1774 |
| 95    | 0.04  | 452802.6      | -   | 0   | 43 (116)  | 49 (511) | 0.4114 |
| 95    | 0.05  | 452802.6      | -   | 0   | 14 (38)   | 56 (589) | 0.8891 |
| 95    | 0.06  | 452802.6      | -   | 0   | 3 (8)     | 58 (619) | 0.9472 |
| 95    | 0.07  | 452802.6      | -   | 0   | 3 (8)     | 58 (619) | 0.9472 |
| 95    | 0.08  | 452802.6      | -   | 0   | 3 (8)     | 58 (619) | 0.9472 |
| 95    | 0.09  | 452802.6      | -   | 0   | 3 (10)    | 55 (617) | 0.9968 |
| 95    | 0.1   | 452802.6      | -   | 0   | 3 (10)    | 53 (617) | 0.9864 |
| 98    | 0.01  | 452802.6      | -   | 0   | 84 (198)  | 9 (429)  | 0.0123 |
| 98    | 0.02  | 452802.6      | -   | 0   | 81 (197)  | 25 (430) | 0.0465 |
| 98    | 0.03  | 452802.6      | -   | 0   | 63 (153)  | 35 (474) | 0.1454 |
| 98    | 0.04  | 452802.6      | -   | 0   | 41 (103)  | 48 (524) | 0.3667 |
| 98    | 0.05  | 452802.6      | -   | 0   | 15 (38)   | 56 (589) | 0.8887 |
| 98    | 0.06  | 452802.6      | -   | 0   | 3 (8)     | 58 (619) | 0.9472 |
| 98    | 0.07  | 452802.6      | -   | 0   | 3 (8)     | 58 (619) | 0.9472 |
| 98    | 0.08  | 452802.6      | -   | 0   | 3 (8)     | 58 (619) | 0.9472 |
| 98    | 0.09  | 452802.6      | -   | 0   | 3 (10)    | 55 (617) | 0.9968 |
| 98    | 0.1   | 452802.6      | -   | 0   | 3 (10)    | 53 (617) | 0.9864 |
| 99    | 0.01  | 452802.6      | -   | 0   | 78 (183)  | 9 (444)  | 0.0124 |
| 99    | 0.02  | 452802.6      | -   | 0   | 77 (184)  | 25 (443) | 0.0441 |
| 99    | 0.03  | 452802.6      | -   | 0   | 62 (146)  | 35 (481) | 0.1381 |
| 99    | 0.04  | 452802.6      | -   | 0   | 41 (99)   | 46 (528) | 0.3243 |
| 99    | 0.05  | 452802.6      | -   | 0   | 14 (33)   | 55 (594) | 0.8765 |
| 99    | 0.06  | 452802.6      | -   | 0   | 4 (11)    | 57 (616) | 0.9463 |
| 99    | 0.07  | 452802.6      | -   | 0   | 4 (11)    | 57 (616) | 0.9463 |
| 99    | 0.08  | 452802.6      | -   | 0   | 4 (11)    | 57 (616) | 0.9463 |
| 99    | 0.09  | 452802.6      | -   | 0   | 2 (5)     | 56 (622) | 0.9969 |
| 99    | 0.1   | 452802.6      | -   | 0   | 2 (5)     | 55 (622) | 0.9899 |
